# Supplementary material
Source: publisher figshare collection journal article supplement (https://frontiersin.figshare.com/ndownloader/files/25606646)
Supplement: Supplementary file 1 [file 25606646]

# -*- coding: utf-8 -*-

"""

Created on Mon Oct 7 13:45:18 2019

@author: Jens

"""

'''

This script accompanies a manuscript (10.32942/osf.io/trg34 version 3). We provide

6 figures with examples of reaction norm evolution.

The full description can be found in the manuscript, but in short

we consider a haploid genotype that faces the decision to produce one of two phenotypes

(P1 and P2) under uncertain environmental conditions. The environment may take one

of the two discrete states E1 and E2, and the probability of E2 is normally distributed

around an environmental cue c with mean m and standard deviation sigma.

P1 and P2 differ in their growth rates in E1 and E2. We calculate the proportion

of P2 that is optimal for a large range of cues c (i.e. the optimal reaction norm)

given various growth rate combinations and sigmas. We then summarise reaction norm

shapes by calculating overall frequency

of P2, and variance among (sd(p(P2))²) and within (sum(p*(1-p))/n) environments.

Growth in E1 and E2 are:

GE1 = p * P1E1 + (1-p) * P2E1 and

GE2 = p * P1E2 + (1-p) * P2E2,

With PnEn representing the offspring numbers of each phenotype-environment combination,

and p representing the proportion of P2. Whether GE1 or GE2 are relevant in a given

year depends on the frequency of E1(or E2) and on chance. The long-term growth given

one frequency of E2 is:

Geom = GE1 ^ (1-f) * GE2 ^ (f)

When f is normally distributed around an environmental cue c:

f(c) = cdf(c, mean , sigma)

We calculate the probability of P2 as function of c, which maximises Geom (i.e.,

the optimal reaction norm shape).

'''

**from** mpl_toolkits**.**mplot3d **import** axes3d

**import** numpy **as** np

**import** math

**import** matplotlib**.**pyplot **as** plt

**import** matplotlib**.**ticker **as** ticker

**from** scipy **import** stats

'''color schemes'''

cmap **=** plt**.**get_cmap**(**'Blues'**)**

blues **=** **[**cmap**(**i**)** **for** i **in** np**.**linspace**(**0.3**,** 1**,** 101**)]**

cmap **=** plt**.**get_cmap**(**'Oranges'**)**

oranges **=** **[**cmap**(**i**)** **for** i **in** np**.**linspace**(**0.3**,** 0.8**,** 101**)]**

cmap **=** plt**.**get_cmap**(**'Greens'**)**

greens **=** **[**cmap**(**i**)** **for** i **in** np**.**linspace**(**0.3**,** 0.8**,** 101**)]**

cmap **=** plt**.**get_cmap **(**"Greys"**)**

greys **=** **[**cmap**(**i**)** **for** i **in** np**.**linspace**(**0.3**,** 0.8**,** 101**)]**

'''functions'''

**def** geom **(**gr**,** f**,** p**):**

'''calculates geometric mean fitness'''

#gr = numpy.array([E1P1,E1P2],[E2P1,E2P2]])

#f = frequency of environment E2

#p = probability of P2

GE1 **=** **(**1**-**p**)** ***** gr**[**0**,**0**]** **+** p ***** gr**[**0**,**1**]**

GE2 **=** **(**1**-**p**)** ***** gr**[**1**,**0**]** **+** p ***** gr**[**1**,**1**]**

g **=** GE1****(**1**-**f**)** ***** **(**GE2**)****f

**return** **(**g**)**

**def** arm **(**gr**,** f**,** p**):**

'''calculates arithmetric mean fitness'''

GE1 **=** **(**1**-**p**)** ***** gr**[**0**,**0**]** **+** p ***** gr**[**0**,**1**]**

GE2 **=** **(**1**-**p**)** ***** gr**[**1**,**0**]** **+** p ***** gr**[**1**,**1**]**

g **=** GE1***(**1**-**f**)** **+** **(**GE2**)***f

**return** **(**g**)**

**def** get_opt**(**gr**,** f**,** accuracy **=** 1000**):**

'''finds the offspring proportion that maximises the geometric mean'''

y **=** **[**geom**(**gr**,**f**,**p**/**accuracy**)** **for** p **in** **range(**accuracy **+**1**)]**

n **=** np**.**array**(**y**)**

opt **=** np**.**where**(**n**==max(**y**))[**0**][**0**]** **/** **(len(**y**)-**1**)**

**return(**opt**)**

**def** plot_fitness**(**sub**,** gr**,** color**,** f **=** 0.5**,** gstyle **=** "solid"**,** astyle **=** "--"**):**

'''plots arithmetic and geometric mean vs offspring proportion'''

g **=** **[**geom**(**gr**,**f**,**p**/**100**)** **for** p **in** **range(**101**)]**

a **=** **[**arm**(**gr**,**f**,**p**/**100**)** **for** p **in** **range(**101**)]**

sub**.**plot**(**g**,** color **=** color**,** linestyle **=** gstyle**)**

sub**.**plot**(**a**,** color **=** color **,**linestyle **=** astyle**)**

#get optima

m **=** **int(**get_opt**(**gr**,**f**)*** 100**)**

sub**.**plot**(**m**,** **max(**g**),** color **=** color**,** marker **=** "o"**)**

''' Figure 1:

draw geometric and arithmetic mean fitness as function of p'''

fig**,** **(**ax1**,** ax2**)** **=** plt**.**subplots**(**2**,** 1**,** sharex **=** **True)**

**for** ax **in** fig**.**get_axes**():**

ax**.**margins**(**x **=** 0.02**)**

ax**.**spines**[**'right'**].**set_visible**(False)**

ax**.**spines**[**'top'**].**set_visible**(False)**

ax**.**yaxis**.**set_ticks_position**(**'left'**)**

ax**.**xaxis**.**set_ticks_position**(**'bottom'**)**

ax**.**label_outer**()**

fig**.**tight_layout**(**pad **=** 2.0**)**

#Panel A, geometric and arithmetic mean for f = 0.5 and f = 0.2

gr **=** np**.**array**([[**4**,**1**],[**0.1**,**1**]])**

plot_fitness**(**ax1**,** gr**,** blues**[**50**])**

plot_fitness**(**ax1**,** gr**,** oranges**[**50**],** f**=** 0.2**)**

ax1**.set(**xlabel**=**''**,**

ylabel**=**'Geometric or\narithmetic mean fitness'**)**

ax1**.**text**(-**7**,** 3.5**,** "A"**,** fontsize**=**14**)**

ax1**.**text**(**0**,** 0.55**,** "AMM"**,** fontsize**=**10**,** ha **=** "center"**)**

ax1**.**text**(**50**,** 0.55**,** "DBH"**,** fontsize**=**10**,** ha **=** "center"**)**

ax1**.**text**(**100**,** 0.55**,** "CBH"**,** fontsize**=**10**,** ha **=** "center"**)**

#plot_fitness(ax1, gr, "green", f = 0.7) leaving that one out to reduce cluttering

#Panel B, borderline scenarios

gr2 **=** np**.**array**([[**4**,**0**],[**0**,**4**]])** #optimal p = 0.5, yet no bet-hedging

gr3 **=** np**.**array**([[**4**,**0**],[**0**,**3.9**]])** #marginal bet-hedging (arithmetic mean of p1 and p2 differ)

plot_fitness**(**ax2**,** gr2**,** blues**[**50**])**

plot_fitness**(**ax2**,** gr3**,** greys**[**50**],** gstyle **=** ":"**,** astyle **=** ":"**)**

plot_fitness**(**ax2**,** gr**,** oranges**[**50**],** f **=** 0.8**)**

ax2**.set(**xlabel**=**'$p$: proportion of diapausing offspring (phenotype P$_2)$'**,**

ylabel**=**'Geometric or\narithmetic mean fitness'**)**

ax2**.**text**(-**7**,** 2.2**,** "B"**,** fontsize**=**14**)**

'''Fig.2: pdf, cdf, 2 reaction norms(4 panels)'''

fig**,** **(**ax1**,** ax2**,** ax3**)** **=** plt**.**subplots**(**3**,** 1**,** sharex **=** **True)**

fig**.**tight_layout**(**pad **=** 2.0**)**

**for** ax **in** fig**.**get_axes**():**

ax**.**margins**(**x **=** 0.02**)**

ax**.**spines**[**'right'**].**set_visible**(False)**

ax**.**spines**[**'top'**].**set_visible**(False)**

ax**.**yaxis**.**set_ticks_position**(**'left'**)**

ax**.**xaxis**.**set_ticks_position**(**'bottom'**)**

ax**.**label_outer**()**

#2A: draw cumulative probability function of three normal distributions

c **=** np**.**linspace**(**0**,**24**,**100**)**

y **=** stats**.**norm**.**cdf**(**c**,** 14**,** 1**)**

ax1**.**plot**(**c**,**y**,** color **=** blues**[**50**])**

y2 **=** stats**.**norm**.**cdf**(**c**,**14**,**4**)**

ax1**.**plot**(**c**,**y2**,** color **=** oranges**[**50**])**

y3 **=** stats**.**norm**.**cdf**(**c**,**14**,**2**)** ***** 0.5

ax1**.**plot**(**c**,**y3**,** color **=** greens**[**50**])**

ax1**.set(**ylabel **=**"Probability of E$_2$"**)**

ax1**.**text**(-**2**,** 1.2**,** "A"**,** fontsize**=**14**)**

#2B: Draw optimal reaction norm shape given c

rn **=[**get_opt**(**gr**,** f**,** accuracy **=**100**)** **for** f **in** y**]**

rn2 **=[**get_opt**(**gr**,** f**,** accuracy **=**100**)** **for** f **in** y2**]**

rn3 **=[**get_opt**(**gr**,** f**,** accuracy **=**100**)** **for** f **in** y3**]**

ax2**.**plot**(**c**,** rn**,** color **=** blues**[**50**])**

ax2**.**plot**(**c**,** rn2**,** color **=** oranges**[**50**])**

ax2**.**plot**(**c**,** rn3**,** color **=** greens**[**50**])**

ax2**.**plot**([**14**,**14**],[**0**,**1**],** color **=** "grey"**,** linestyle **=** ":"**)**

#add points at c = 13h for comparison with main text

p1 **=** get_opt**(**gr**,** f **=**stats**.**norm**.**cdf**(**13**,** 14**,** 1**)** **)** # f is the probability of winter onset

p2 **=** get_opt**(**gr**,** f **=**stats**.**norm**.**cdf**(**13**,** 14**,** 4**)** **)** # given c = 13h on a normal distribution

p3 **=** get_opt**(**gr**,** f **=**stats**.**norm**.**cdf**(**13**,** 14**,** 2**)** *****0.5**)**# with mean 14h

ax2**.**plot**(**13**,**p1**,**color **=** blues**[**50**],** marker **=** "."**)**

ax2**.**plot**(**13**,**p2**,**color **=** oranges**[**50**],** marker **=** "."**)**

ax2**.**plot**(**13**,**p3**,**color **=** greens**[**50**],** marker **=** "."**)**

ax2**.set(**ylabel **=**"Proportion of P$_2$"**)**

ax2**.**text**(-**2**,** 1.2**,** "B"**,** fontsize**=**14**)**

ax2**.**text**(**0**,** 0**,** "AMM"**,** fontsize**=**10**)**

ax2**.**text**(**0**,** 0.5**,** "DBH"**,** fontsize**=**10**,** va **=** "center"**)**

ax2**.**text**(**0**,** 1**,** "CBH"**,** fontsize**=**10**,** va **=** "center"**)**

#2C: same, but for lower environmental amplitude

gr2 **=** np**.**array**([[**4**,**1.8**],** **[**0**,**1.8**]])**

rn **=[**get_opt**(**gr2**,** f**,** accuracy **=**100**)** **for** f **in** y**]**

rn2 **=[**get_opt**(**gr2**,** f**,** accuracy **=**100**)** **for** f **in** y2**]**

rn3 **=[**get_opt**(**gr2**,** f**,** accuracy **=**100**)** **for** f **in** y3**]**

ax3**.**plot**(**c**,** rn**,** color **=** blues**[**50**])**

ax3**.**plot**(**c**,** rn2**,** color **=** oranges**[**50**])**

ax3**.**plot**(**c**,** rn3**,** color **=** greens**[**50**])**

ax3**.**plot**([**14**,**14**],[**0**,**1**],** color **=** "grey"**,** linestyle **=** ":"**)**

#add points at c = 13h for comparison with main text

p1 **=** get_opt**(**gr2**,** f **=**stats**.**norm**.**cdf**(**13**,** 14**,** 1**)** **)** # f is the probability of winter onset

p2 **=** get_opt**(**gr2**,** f **=**stats**.**norm**.**cdf**(**13**,** 14**,** 4**)** **)** # given c = 13h on a normal distribution

p3 **=** get_opt**(**gr2**,** f **=**stats**.**norm**.**cdf**(**13**,** 14**,** 2**)** *****0.5**)**# with mean 14h

ax3**.**plot**(**13**,**p1**,**color **=** blues**[**50**],** marker **=** "."**)**

ax3**.**plot**(**13**,**p2**,**color **=** oranges**[**50**],** marker **=** "."**)**

ax3**.**plot**(**13**,**p3**,**color **=** greens**[**50**],** marker **=** "."**)**

ax3**.**text**(-**2**,** 1.2**,** "C"**,** fontsize**=**14**)**

ax3**.**text**(**0**,** 0**,** "AMM"**,** fontsize**=**10**)**

ax3**.**text**(**0**,** 0.5**,** "DBH"**,** fontsize**=**10**,** va **=** "center"**)**

ax3**.**text**(**0**,** 1**,** "CBH"**,** fontsize**=**10**,** va **=** "center"**)**

ax3**.set(**xlabel**=**'Environmental cue (night length)'**,**ylabel **=**"Proportion of P$_2$"**)**

'''Fig.3: Classification of reaction norm shapes (4 panels)'''

**def** pars**(**p**):** #lines will be colored according to r or s

''' calculate variance among and within environments

var_within = sum p*(1-p) / n

var_among = sd^2'''

p2 **=[**i ***** **(**1**-**i**)** **for** i **in** p**]**

f **=** np**.**mean**(**p**)**

among **=** np**.**std**(**p**)****2

within **=** np**.**mean**(**p2**)**

r **=** among**/(**among **+** within**)**

**if** math**.**isnan**(**r**):**

r **=** 0

**return([**f**,** among**,** within**,** among**+**within**,** r**])**

**def** sigmoid**(**x**,** b**,**c**,**d**,**e**):**

p **=** c**+** **(**d**-**c**)/(**1**+(**np**.**exp**(**b***(**x**-**e**))))**

**return(**p**)**

fig **=** plt**.**figure**()**

fig**.**tight_layout**(**pad **=** 2.0**)**

#3A: variance composition

c **=** np**.**linspace**(**0**,**24**,**100**)**

#a few typical reaction norm shapes

DBH **=** **[**0.5 **for** i **in** **range(**100**)]**

PP **=** **[round(**i**/**100**)** **for** i **in** **range(**100**)]** #rounding to 0/1 makes step function

fPP **=** sigmoid**(**c**,-**0.2**,**0**,**1**,**12**)**

pPP **=** **[round(**i**/**100**)***0.8 **for** i **in** **range(**100**)]** #partial plasticity

AMM **=** **[**0.01 **for** i **in** **range(**100**)]**

CBH **=** **[**0.99 **for** i **in** **range(**100**)]**

pDBH **=[**0.8 **for** i **in** **range(**100**)]**

sPP **=** sigmoid**(**c**,-**0.5**,**0**,**0.3**,**14**)**

sPP2 **=** sigmoid**(**c**,** 0.5**,**0.7**,**1**,**14**)**

lPP **=** **[round** **(**i**/**100 **-**0.2**)** **for** i **in** **range(**100**)]** #early diapause

pPP2 **=** **[**1**-round(**i**/**100**)***0.4 **for** i **in** **range(**100**)]** #partial plasticity

ePP **=** **[round** **(**i**/**100 **+**0.2**)** **for** i **in** **range(**100**)]** #early diapause

#3A Variance composition

ax1 **=** fig**.**add_subplot**(**2**,**2**,**1**)**

ax1**.**margins**(**x **=** 0.02**)**

ax1**.**spines**[**'right'**].**set_visible**(False)**

ax1**.**spines**[**'top'**].**set_visible**(False)**

ax1**.**yaxis**.**set_ticks_position**(**'left'**)**

ax1**.**xaxis**.**set_ticks_position**(**'bottom'**)**

ax1**.set(** ylabel **=** "Proportion of P$_2$"**)**

ax1**.**text**(-**3**,** 1.1**,** "A"**,** fontsize**=**14**)**

ax1**.**label_outer**()**

ax1**.**plot**(**c**,**DBH**,** color **=** blues**[int(**pars**(**DBH**)[**4**]***100**)])**

ax1**.**plot**(**c**,**PP**,** color **=** blues**[int(**pars**(**PP**)[**4**]***100**)])**

ax1**.**plot**(**c**,** fPP**,** color**=** blues**[int(**pars**(**fPP**)[**4**]***100**)])**

ax1**.**plot**(**c**+**0.1**,**pPP**,** color **=** blues**[int(**pars**(**pPP**)[**4**]***100**)],** linestyle **=** "--"**)**

#3B: Sum of variance components

ax2 **=** fig**.**add_subplot**(**2**,**2**,**2**)**

ax2**.**margins**(**x **=** 0.02**)**

ax2**.**spines**[**'right'**].**set_visible**(False)**

ax2**.**spines**[**'top'**].**set_visible**(False)**

ax2**.**yaxis**.**set_ticks_position**(**'left'**)**

ax2**.**xaxis**.**set_ticks_position**(**'bottom'**)**

ax2**.**text**(-**3**,** 1.1**,** "B"**,** fontsize**=**14**)**

ax2**.set(**xlabel **=** "Environmental cue c"**)**

ax2**.**plot**(**c**,**AMM**,** color **=** oranges**[int(**pars**(**AMM**)[**0**]***100**)])**

ax2**.**plot**(**c**,**CBH**,** color **=** oranges**[int(**pars**(**CBH**)[**0**]***100**)])**

ax2**.**plot**(**c**,**pDBH**,** color **=** oranges**[int(**pars**(**pDBH**)[**0**]***100**)])**

ax2**.**plot**(**c**,** sPP**,** color **=** oranges**[int(**pars**(**sPP**)[**0**]***100**)],** linestyle **=** "--"**)**

ax2**.**plot**(**c**,** sPP2**,** color **=** oranges**[int(**pars**(**sPP2**)[**0**]***100**)],** linestyle **=** "--"**)**

#3C: Critical day length

ax3 **=** fig**.**add_subplot**(**2**,**2**,**3**)**

ax3**.**margins**(**x **=** 0.02**)**

ax3**.**spines**[**'right'**].**set_visible**(False)**

ax3**.**spines**[**'top'**].**set_visible**(False)**

ax3**.**yaxis**.**set_ticks_position**(**'left'**)**

ax3**.**xaxis**.**set_ticks_position**(**'bottom'**)**

ax3**.set(**xlabel **=** "Environmental cue c"**,** ylabel **=** "Proportion of P$_2$"**)**

ax3**.**text**(-**3**,** 1.1**,** "C"**,** fontsize**=**14**)**

x1 **=** sigmoid**(**c**,**3**,**0.25**,**1**,**8**)**

x2 **=** sigmoid**(**c**,**0.3**,**0**,**1**,**12**)**

ax3**.**plot**(**c**,**1**-**x1**,** color **=** greens**[**30**])**

ax3**.**plot**(**c**,**1**-**x2**,** color **=** greens**[**70**])**

#3D:3 dimensional

ax4 **=** fig**.**add_subplot**(**2**,**2**,**4**,** projection**=**"3d"**)**

ax4**.**set_xlabel**(**'Variance composition(r)'**)**

ax4**.**set_ylabel**(**'Frequency of P$_2$ (f)'**)**

ax4**.**set_zlabel**(**'Inflection point'**)**

ax4**.**axes**.**set_xlim3d**(**left**=**0**,** right**=**1**)**

ax4**.**axes**.**set_ylim3d**(**bottom**=**0**,** top**=**1**)**

ax4**.**axes**.**set_zlim3d**(**bottom**=**0**,** top**=**14**)**

ax4**.**dist **=** 9

ax4**.**text2D**(**0.9**,**2.4**,** "D"**,** transform**=**ax4**.**transAxes**,** fontsize **=** 14**)**

plt**.**autoscale**(False)**

val **=** np**.**linspace**(**0**,**3**,**10**)**

kal **=** np**.**linspace**(**0**,**1**,**10**)**

ral **=** np**.**linspace**(**0**,**1**,**10**)**

pal **=** np**.**linspace**(**4**,**12**,**3**)**

**for** i **in** val**:**

**for** j **in** kal**:**

**for** k **in** ral**:**

**for** l **in** pal**:**

parms **=** pars**(**sigmoid**(**c**,-**1***** i**,**j**,**k**,**l**))**

ax4**.**scatter3D**(**parms**[**4**],** parms**[**0**],** l**,** color**=** greys**[int(**l ***** 10**-**20**)])**

#the example points from panel A - C:

ax4**.**scatter3D**(**pars**(**DBH**)[**4**],** pars**(**DBH**)[**0**],** 12**,** color**=** blues**[int(**pars**(**DBH**)[**4**]***100**)],** s **=** 50**)**

ax4**.**scatter3D**(**pars**(**PP**)[**4**],** pars**(**PP**)[**0**],** 12**,** color**=** blues**[int(**pars**(**PP**)[**4**]***100**)],** s **=** 50**)**

ax4**.**scatter3D**(**pars**(**fPP**)[**4**],** pars**(**fPP**)[**0**],** 12**,** color**=** blues**[int(**pars**(**fPP**)[**4**]***100**)],** s **=** 50**)**

ax4**.**scatter3D**(**pars**(**pPP**)[**4**],** pars**(**pPP**)[**0**],** 12**,** color**=** blues**[int(**pars**(**pPP**)[**4**]***100**)],** s **=** 50**)**

ax4**.**scatter3D**(**pars**(**CBH**)[**4**],** pars**(**CBH**)[**0**],** 12**,** color**=** oranges**[int(**pars**(**CBH**)[**0**]***100**)],** s **=** 50**)**

ax4**.**scatter3D**(**pars**(**AMM**)[**4**],** pars**(**AMM**)[**0**],** 12**,** color**=** oranges**[int(**pars**(**AMM**)[**0**]***100**)],** s **=** 50**)**

ax4**.**scatter3D**(**pars**(**pDBH**)[**4**],** pars**(**pDBH**)[**0**],** 12**,** color**=** oranges**[int(**pars**(**pDBH**)[**0**]***100**)],** s **=** 50**)**

ax4**.**scatter3D**(**pars**(**sPP**)[**4**],** pars**(**sPP**)[**0**],** 10**,** color**=** oranges**[int(**pars**(**sPP**)[**0**]***100**)],** s **=** 50**)**

#ax4.scatter3D(pars(sPP2)[4], pars(sPP2)[0], 14, color= oranges[int(pars(sPP2)[0]*100)], s = 50)

ax4**.**scatter3D**(**pars**(**x1**)[**4**],** pars**(**x1**)[**0**],** 8**,** color**=** greens**[**30**],** s **=** 50**)**

ax4**.**scatter3D**(**pars**(**x2**)[**4**],** pars**(**x2**)[**0**],** 12**,** color**=** greens**[**70**],** s **=** 50**)**

'''alternative representation of 3D, for supplement'''

x **=** np**.**linspace**(**0**,**24**,**100**)**

fig**,**axs **=** plt**.**subplots**(**2**,**3**)**

inf_list **=** np**.**linspace**(**12**,**4**,**9**)**

axlist **=** **[**'0,0'**,** '0,1'**,** '0,2'**,** '1,0'**,** '1,1'**,** '1,2'**]**

**for** e **in** **range(**6**):**

val **=** np**.**linspace**(**0**,**3**,**10**)**

kal **=** np**.**linspace**(**0**,**1**,**10**)**

ral **=** np**.**linspace**(**0**,**1**,**10**)**

**for** b **in** val**:**

**for** c **in** kal**:**

**for** d **in** ral**:**

parms **=** pars**(**sigmoid**(**x**,-**1***** b**,**c**,**d**,**inf_list**[**e**]))**

axs**[eval(**axlist**[**e**])].**plot**(**parms**[**4**],**parms**[**0**],** marker **=** "o"**,**

color**=** greys**[int(**inf_list**[**e**]** ***** 10**-**20**)])**

**for** ax **in** axs**.**flat**:**

ax**.**label_outer**()**

ax**.**margins**(**x **=** 0.02**)**

ax**.**spines**[**'right'**].**set_visible**(False)**

ax**.**spines**[**'top'**].**set_visible**(False)**

axs**[**0**,**0**].set(**ylabel **=** 'Frequency of P$_2$ (f)'**)**

axs**[**1**,**0**].set(**ylabel **=** 'Frequency of P$_2$ (f)'**)**

axs**[**1**,**1**].set(**xlabel **=** 'Variance composition(r)'**)**

axs**[**0**,**0**].**text**(**0.6**,** 1**,** "i = 12"**)**

axs**[**0**,**1**].**text**(**0.6**,** 1**,** "i = 11"**)**

axs**[**0**,**2**].**text**(**0.6**,** 1**,** "i = 10"**)**

axs**[**1**,**0**].**text**(**0.6**,** 1**,** "i = 9"**)**

axs**[**1**,**1**].**text**(**0.6**,** 1**,** "i = 8"**)**

axs**[**1**,**2**].**text**(**0.6**,** 1**,** "i = 7"**)**

'''Fig. 4: optimal reaction norm shapes'''

#additionally: do P2 with 1 / 1 ; 0.5 /3 , 0/4

#We make 100 point estimates (c) along the reaction norm shape, and calculate variance

#among and within over these 100 points. This is done for multiple growth rates and

#500 environments that differ in standard deviations

#calculate reaction norm shapes:

gr_list **=** **[]**

i_l **=[**2**,**3**,**4**]**

j_l **=** **[**0.1**,**0.33**,**0.66**]**

**for** j **in** j_l**:**

**for** i **in** i_l**:**

gr_list**.**append**(**np**.**array**([[**i**,** 1**],** **[**j**,** 1**]]))**

sd_list **=** np**.**linspace**(**0**,**10**,**500**)+**0.001

**def** get_pars**(**gr**,** sd_list**,** A**):**

pars_list **=** **[]**

c **=** np**.**linspace**(**0**,**24**,**100**)**

**for** i **in** sd_list**:**

E **=** stats**.**norm**.**cdf**(**c**,**14**,**i**)** *****A

rn **=[**get_opt**(**gr**,** f**,** accuracy **=**100**)** **for** f **in** E**]**

pars_list**.**append**(**pars**(**rn**))**

**return(**pars_list**)**

A **=** 1

params **=** **[**get_pars**(**i**,** sd_list**,** A**)** **for** i **in** gr_list**]** #takes a while

col_list **=** **[** greens**[**50**],** oranges**[**50**],** blues**[**50**]** **]**

style_list **=** **[**"-"**,** "--"**,** "-."**]**

fig**,** **((**ax1**,** ax2**),** **(**ax3**,** ax4**))** **=** plt**.**subplots**(**2**,** 2**)**

**for** ax **in** fig**.**get_axes**():**

ax**.**margins**(**x **=** 0.02**)**

ax**.**spines**[**'right'**].**set_visible**(False)**

ax**.**spines**[**'top'**].**set_visible**(False)**

ax**.**yaxis**.**set_ticks_position**(**'left'**)**

ax**.**xaxis**.**set_ticks_position**(**'bottom'**)**

fig**.**tight_layout**(**pad **=** 2.0**)**

#left side: f and r

**for** i **in** **range(len(**params**)):**

f**,**r **=** **[],** **[]**

**for** j **in** **range(**500**):**

f**.**append**(**params**[**i**][**j**][**0**])**

r**.**append**(**params**[**i**][**j**][**4**])**

ax1**.**plot**(**sd_list**,**f**,** color **=** col_list**[**i**%**3**],** linestyle **=** style_list**[**i**//**3**])**

ax3**.**plot**(**sd_list**,**r**,** color **=** col_list**[**i**%**3**],** linestyle **=** style_list**[**i**//**3**])**

ax1**.set(**xlabel **=** ""**,** ylabel **=**

"Mean frequency of P$_2$ (f)"**,** ylim **=** **(-**0.01**,**1**))**

ax1**.**text**(-**1**,** 1.1**,** "A"**,** fontsize**=**14**)**

ax3**.set(**xlabel **=** "Standard deviation of the environment"**,** ylabel **=**

"Variance composition (r)"**,** ylim **=** **(-**0.01**,**1**))**

ax3**.**text**(-**1**,** 1.1**,** "C"**,** fontsize**=**14**)**

#right side: example reaction norms

E1 **=** stats**.**norm**.**cdf**(**c**,**14**,**2**)***A

E2 **=** stats**.**norm**.**cdf**(**c**,**14**,**8**)***A

rn1 **=** **[**get_opt**(**gr_list**[**2**],**f**,** accuracy **=** 100**)** **for** f **in** E1**]**

rn2 **=** **[**get_opt**(**gr_list**[**2**],**f**,** accuracy **=** 100**)** **for** f **in** E2**]**

ax2**.**plot**(**c**,**rn1**,** color **=** blues**[**80**])**

ax2**.**plot**(**c**,**rn2**,** color **=** blues**[**20**])**

rn1b **=** **[**get_opt**(**gr_list**[**0**],**f**,** accuracy **=** 100**)** **for** f **in** E1**]**

rn2b **=** **[**get_opt**(**gr_list**[**0**],**f**,** accuracy **=** 100**)** **for** f **in** E2**]**

ax2**.**plot**(**c**,**rn1b**,** color **=** greens**[**80**])**

ax2**.**plot**(**c**,**rn2b**,** color **=** greens**[**20**])**

ax2**.set(**ylabel**=** "Proportion of P$_2$"**,** ylim **=** **(-**0.01**,**1.01**))**

ax2**.**text**(-**2**,** 1.1**,** "B"**,** fontsize**=**14**)**

rn1 **=** **[**get_opt**(**gr_list**[**8**],**f**,** accuracy **=** 100**)** **for** f **in** E1**]**

rn2 **=** **[**get_opt**(**gr_list**[**8**],**f**,** accuracy **=** 100**)** **for** f **in** E2**]**

ax4**.**plot**(**c**,**rn1**,** color **=** blues**[**80**],** linestyle **=** style_list**[**2**])**

ax4**.**plot**(**c**,**rn2**,** color **=** blues**[**20**],** linestyle **=** style_list**[**2**])**

rn1b **=** **[**get_opt**(**gr_list**[**6**],**f**,** accuracy **=** 100**)** **for** f **in** E1**]**

rn2b **=** **[**get_opt**(**gr_list**[**6**],**f**,** accuracy **=** 100**)** **for** f **in** E2**]**

ax4**.**plot**(**c**,**rn1b**,** color **=** greens**[**80**],** linestyle **=** style_list**[**2**])**

ax4**.**plot**(**c**,**rn2b**,** color **=** greens**[**20**],** linestyle **=** style_list**[**2**])**

ax4**.set(**xlabel **=** "Environmental cue c"**,** ylabel**=** "Proportion of P$_2$"**,** ylim **=** **(-**0.01**,**1.01**))**

ax4**.**text**(-**2**,** 1.1**,** "D"**,** fontsize**=**14**)**

'''Fig. 5: different environmental amplitude

nearly exact copy of above but with A = 0.5, and with different display in panel D'''

A **=** 0.5

params **=** **[**get_pars**(**i**,** sd_list**,** A**)** **for** i **in** gr_list**]** #takes a while

fig**,** **((**ax1**,** ax2**),** **(**ax3**,** ax4**))** **=** plt**.**subplots**(**2**,** 2**)**

**for** ax **in** fig**.**get_axes**():**

ax**.**margins**(**x **=** 0.02**)**

ax**.**spines**[**'right'**].**set_visible**(False)**

ax**.**spines**[**'top'**].**set_visible**(False)**

ax**.**yaxis**.**set_ticks_position**(**'left'**)**

ax**.**xaxis**.**set_ticks_position**(**'bottom'**)**

fig**.**tight_layout**(**pad **=** 2.0**)**

#left side: f and r

**for** i **in** **range(len(**params**)):**

f**,**r **=** **[],** **[]**

**for** j **in** **range(**500**):**

f**.**append**(**params**[**i**][**j**][**0**])**

r**.**append**(**params**[**i**][**j**][**4**])**

ax1**.**plot**(**sd_list**,**f**,** color **=** col_list**[**i**%**3**],** linestyle **=** style_list**[**i**//**3**])**

ax3**.**plot**(**sd_list**,**r**,** color **=** col_list**[**i**%**3**],** linestyle **=** style_list**[**i**//**3**])**

ax1**.set(**xlabel **=** ""**,** ylabel **=**

"Mean frequency of P$_2$ (f)"**,** ylim **=** **(-**0.01**,**1**))**

ax1**.**text**(-**1**,** 1.1**,** "A"**,** fontsize**=**14**)**

ax3**.set(**xlabel **=** "Standard deviation of the environment"**,** ylabel **=**

"Variance composition (r)"**,** ylim **=** **(-**0.01**,**1**))**

ax3**.**text**(-**1**,** 1.1**,** "C"**,** fontsize**=**14**)**

#right side: example reaction norms

E1 **=** stats**.**norm**.**cdf**(**c**,**14**,**2**)***A

E2 **=** stats**.**norm**.**cdf**(**c**,**14**,**8**)***A

rn1 **=** **[**get_opt**(**gr_list**[**2**],**f**,** accuracy **=** 100**)** **for** f **in** E1**]**

rn2 **=** **[**get_opt**(**gr_list**[**2**],**f**,** accuracy **=** 100**)** **for** f **in** E2**]**

ax2**.**plot**(**c**,**rn1**,** color **=** blues**[**80**])**

ax2**.**plot**(**c**,**rn2**,** color **=** blues**[**20**])**

rn1b **=** **[**get_opt**(**gr_list**[**0**],**f**,** accuracy **=** 100**)** **for** f **in** E1**]**

rn2b **=** **[**get_opt**(**gr_list**[**0**],**f**,** accuracy **=** 100**)** **for** f **in** E2**]**

ax2**.**plot**(**c**,**rn1b**,** color **=** greens**[**80**])**

ax2**.**plot**(**c**,**rn2b**,** color **=** greens**[**20**])**

ax2**.set(**ylabel**=** "Proportion of P$_2$"**,** ylim **=** **(-**0.01**,**1.01**))**

ax2**.**text**(-**2**,** 1.1**,** "B"**,** fontsize**=**14**)**

rn1 **=** **[**get_opt**(**gr_list**[**5**],**f**,** accuracy **=** 100**)** **for** f **in** E1**]**

rn2 **=** **[**get_opt**(**gr_list**[**5**],**f**,** accuracy **=** 100**)** **for** f **in** E2**]**

ax4**.**plot**(**c**,**rn1**,** color **=** blues**[**80**],** linestyle **=** style_list**[**1**])**

ax4**.**plot**(**c**,**rn2**,** color **=** blues**[**20**],** linestyle **=** style_list**[**1**])**

rn1b **=** **[**get_opt**(**gr_list**[**3**],**f**,** accuracy **=** 100**)** **for** f **in** E1**]**

rn2b **=** **[**get_opt**(**gr_list**[**3**],**f**,** accuracy **=** 100**)** **for** f **in** E2**]**

ax4**.**plot**(**c**,**rn1b**,** color **=** greens**[**80**],** linestyle **=** style_list**[**1**])**

ax4**.**plot**(**c**,**rn2b**,** color **=** greens**[**20**],** linestyle **=** style_list**[**1**])**

ax4**.set(**xlabel **=** "Environmental cue c"**,** ylabel**=** "Proportion of P$_2$"**,** ylim **=** **(-**0.01**,**1.01**))**

ax4**.**text**(-**2**,** 1.1**,** "D"**,** fontsize**=**14**)**

'''supplementary: different mean c'''

'''again, mostly copy of fig.4'''

**def** get_pars**(**gr**,** sd_list**,** A**):**

pars_list **=** **[]**

c **=** np**.**linspace**(**0**,**24**,**100**)**

**for** i **in** sd_list**:**

E **=** stats**.**norm**.**cdf**(**c**,**9**,**i**)** *****A

rn **=[**get_opt**(**gr**,** f**,** accuracy **=**100**)** **for** f **in** E**]**

pars_list**.**append**(**pars**(**rn**))**

**return(**pars_list**)**

A **=** 1

params **=** **[**get_pars**(**i**,** sd_list**,** A**)** **for** i **in** gr_list**]** #takes a while

col_list **=** **[** greens**[**50**],** oranges**[**50**],** blues**[**50**]** **]**

style_list **=** **[**"-"**,** "--"**,** "-."**]**

fig**,** **((**ax1**,** ax2**),** **(**ax3**,** ax4**))** **=** plt**.**subplots**(**2**,** 2**)**

**for** ax **in** fig**.**get_axes**():**

ax**.**margins**(**x **=** 0.02**)**

ax**.**spines**[**'right'**].**set_visible**(False)**

ax**.**spines**[**'top'**].**set_visible**(False)**

ax**.**yaxis**.**set_ticks_position**(**'left'**)**

ax**.**xaxis**.**set_ticks_position**(**'bottom'**)**

fig**.**tight_layout**(**pad **=** 2.0**)**

#left side: f and r

**for** i **in** **range(len(**params**)):**

f**,**r **=** **[],** **[]**

**for** j **in** **range(**500**):**

f**.**append**(**params**[**i**][**j**][**0**])**

r**.**append**(**params**[**i**][**j**][**4**])**

ax1**.**plot**(**sd_list**,**f**,** color **=** col_list**[**i**%**3**],** linestyle **=** style_list**[**i**//**3**])**

ax3**.**plot**(**sd_list**,**r**,** color **=** col_list**[**i**%**3**],** linestyle **=** style_list**[**i**//**3**])**

ax1**.set(**xlabel **=** ""**,** ylabel **=**

"Mean frequency of P$_2$ (f)"**,** ylim **=** **(-**0.01**,**1**))**

ax1**.**text**(-**1**,** 1.1**,** "A"**,** fontsize**=**14**)**

ax3**.set(**xlabel **=** "Standard deviation of the environment"**,** ylabel **=**

"Variance composition (r)"**,** ylim **=** **(-**0.01**,**1**))**

ax3**.**text**(-**1**,** 1.1**,** "C"**,** fontsize**=**14**)**

#right side: example reaction norms

E1 **=** stats**.**norm**.**cdf**(**c**,**9**,**2**)***A

E2 **=** stats**.**norm**.**cdf**(**c**,**9**,**8**)***A

rn1 **=** **[**get_opt**(**gr_list**[**2**],**f**,** accuracy **=** 100**)** **for** f **in** E1**]**

rn2 **=** **[**get_opt**(**gr_list**[**2**],**f**,** accuracy **=** 100**)** **for** f **in** E2**]**

ax2**.**plot**(**c**,**rn1**,** color **=** blues**[**80**])**

ax2**.**plot**(**c**,**rn2**,** color **=** blues**[**20**])**

rn1b **=** **[**get_opt**(**gr_list**[**0**],**f**,** accuracy **=** 100**)** **for** f **in** E1**]**

rn2b **=** **[**get_opt**(**gr_list**[**0**],**f**,** accuracy **=** 100**)** **for** f **in** E2**]**

ax2**.**plot**(**c**,**rn1b**,** color **=** greens**[**80**])**

ax2**.**plot**(**c**,**rn2b**,** color **=** greens**[**20**])**

ax2**.set(**ylabel**=** "Proportion of P$_2$"**,** ylim **=** **(-**0.01**,**1.01**))**

ax2**.**text**(-**2**,** 1.1**,** "B"**,** fontsize**=**14**)**

rn1 **=** **[**get_opt**(**gr_list**[**8**],**f**,** accuracy **=** 100**)** **for** f **in** E1**]**

rn2 **=** **[**get_opt**(**gr_list**[**8**],**f**,** accuracy **=** 100**)** **for** f **in** E2**]**

ax4**.**plot**(**c**,**rn1**,** color **=** blues**[**80**],** linestyle **=** style_list**[**2**])**

ax4**.**plot**(**c**,**rn2**,** color **=** blues**[**20**],** linestyle **=** style_list**[**2**])**

rn1b **=** **[**get_opt**(**gr_list**[**6**],**f**,** accuracy **=** 100**)** **for** f **in** E1**]**

rn2b **=** **[**get_opt**(**gr_list**[**6**],**f**,** accuracy **=** 100**)** **for** f **in** E2**]**

ax4**.**plot**(**c**,**rn1b**,** color **=** greens**[**80**],** linestyle **=** style_list**[**2**])**

ax4**.**plot**(**c**,**rn2b**,** color **=** greens**[**20**],** linestyle **=** style_list**[**2**])**

ax4**.set(**xlabel **=** "Environmental cue c"**,** ylabel**=** "Proportion of P$_2$"**,** ylim **=** **(-**0.01**,**1.01**))**

ax4**.**text**(-**2**,** 1.1**,** "D"**,** fontsize**=**14**)**
